# Supplementary material for: Accumulation of Ascorbic Acid in Tomato Cell Culture: Influence of the Genotype, Source Explant and Time of In Vitro Cultivation
Source: PubMed Central journal article supplement (PMC7139686; doi:10.3390/antiox9030222), 2020-03-07
Supplement: antioxidants-09-00222-s001.pdf [file antioxidants-09-00222-s001.pdf]

Supplementary Tables 1: List of the primers used in this study. Primers sequences are in 5' to 3' order.

| Abbreviation | Name                                                 | Accession number | Primer Forward          | Primer Reverse         |
|--------------|------------------------------------------------------|------------------|-------------------------|------------------------|
| AO           | L-ascorbate oxidase                                  | NM_001247900.2   | CATGGGCTGATGGAACAGAA    | CCCCTGGCACAATAGGACATT  |
| APX1(cyt)    | Cytosolic ascorbate peroxidase 1 (APX1)              | NM_001247853.2   | AGCAGTTTCCCACCCTCTCC    | CAACACCAGCCAACTGATGG   |
| APX2(cyt)    | Cytosolic ascorbate peroxidase 2 (APX2)              | NM_001247859.2   | TACGGGAGGACCTGATGTTCC   | TCTGGTTTGTCTCTCTGCCA   |
| APX3(per)    | L-ascorbate peroxidase 3 peroxisomal                 | NM_001308331.1   | AGACCTCCGCGCTCTCATC     | CGAAGCATGATCGGAGCAC    |
| APX7(cp)     | Stromal ascorbate peroxidase 7 (APX7)                | NM_001306170.1   | ATGGGAGGATGGATGTGTCC    | GCCTTCCTTCTTCTGGGCAT   |
| b-GLU        | Beta-glucosidase                                     | NM_001247483.2   | TGGGGATCAGGATACACACAG   | TCATCCAAAGAGCAGAACGCT  |
| DHAR         | Dehydroascorbate reductase 1                         | NM_001247893.2   | CCATCTCGAGGTGGCTCTTG    | GCTTTCAGGCACACTCCACTT  |
| EF1A         | Elongation Factor 1-alpha                            | NM_001247106.2   | GACCAACCCTCCTTGAGGCT    | ATGGCCTCTTGGGCTCATTA   |
| GLDH         | L-galactono-1,4-lactone dehydrogenase                | NM_001247674.3   | GATGCATACAATCAAGCGCG    | AGATAGGATGCGGTTTGGGTC  |
| GMP1         | GDP-D-mannose pyrophosphorylase 1                    | NM_001247096.2   | TTCGGTACTCGGCTCAGGC     | TCGACAAGTGGCTTTGGGAC   |
| GMP2         | GDP-mannose pyrophosphorylase                        | XM_004240879.4   | GTACCCGTTGAGGCCATTA     | AATCAACCAGTGGCTTTGGG   |
| MDHAR1       | Monodehydroascorbate reductase (NADH)-like protein 1 | NM_001247084.2   | CACGTTTACCGGGCTTTCAT    | GTTTGCCTCTCACCACCAGC   |
| MDHAR2       | Monodehydroascorbate reductase (NADH)-like protein 2 | NM_001331188.1   | CACAACTCTATTCAAAGGGCAAG | TGTTTTGAAGAACGCATCTGTC |
